# Supplementary material for: Ruthenium(ii) p-cymene complexes of pyridine-2-carboxaldehyde and 2-amino benzothiazole-based ligands: cytoselective and in vitro live cell imaging agents
Source: Royal Society of Chemistry journal article supplement (doi:10.1039/d0nj04137h), 2021-01-01
Supplement: d0nj04137h1.pdf [file d0nj04137h1.pdf]

## Supporting Information

### **Ruthenium(II) *p*-cymene complex of pyridine-2-carboxaldehyde and 2-amino benzothiazole based ligand: A cytoselective and *in vitro* live cell imaging agent†**

Anuja PK, Priyankar Paira\*

# $^1\text{H}$ NMR spectra of complex RuL1

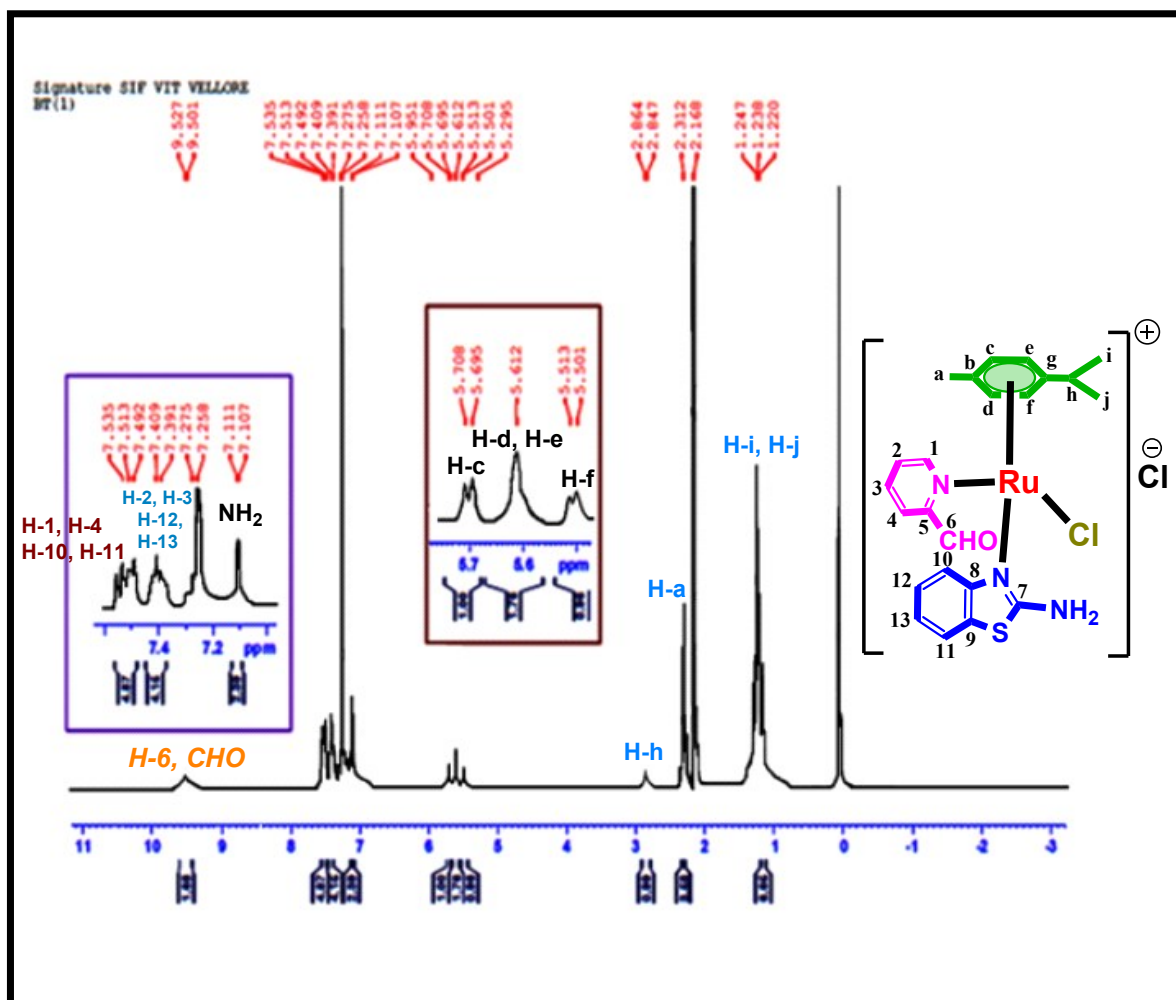

# ESI-MS of complex RuL1

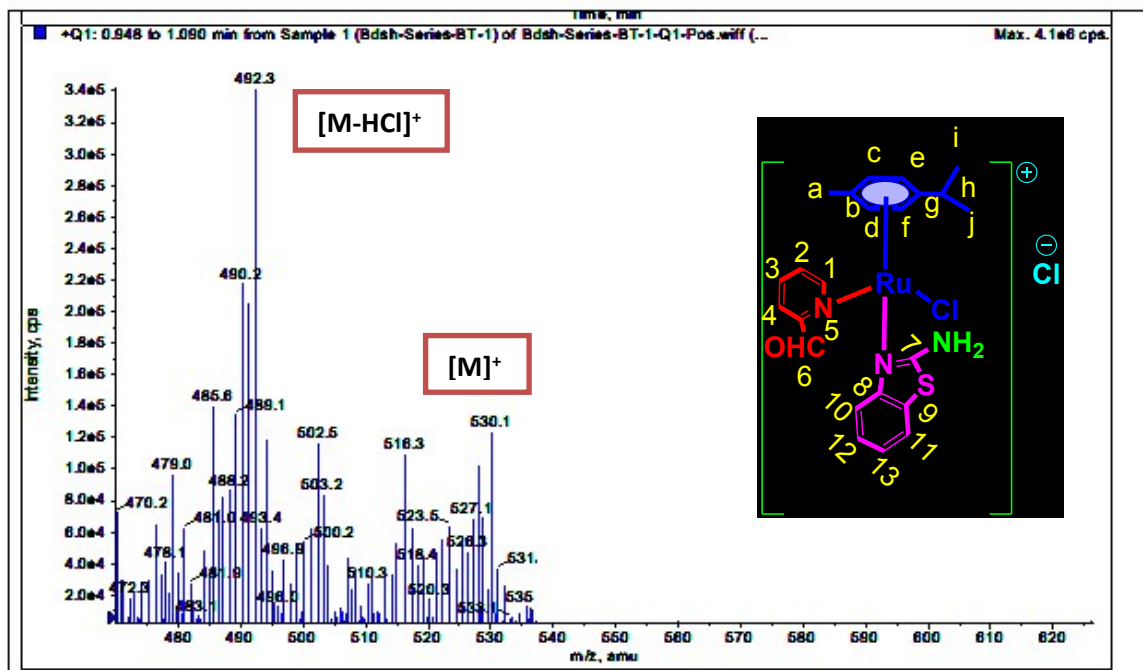

## IR spectra of RuL1

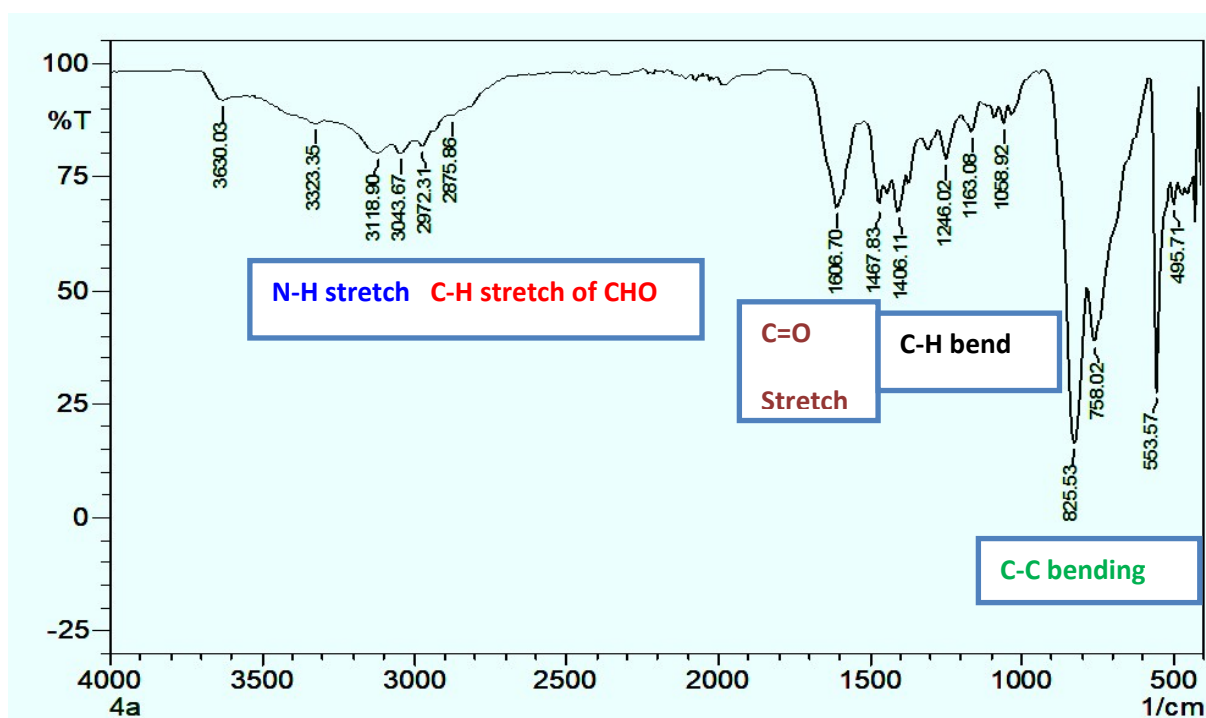

# $^1\text{H}$ NMR of complex RuL2

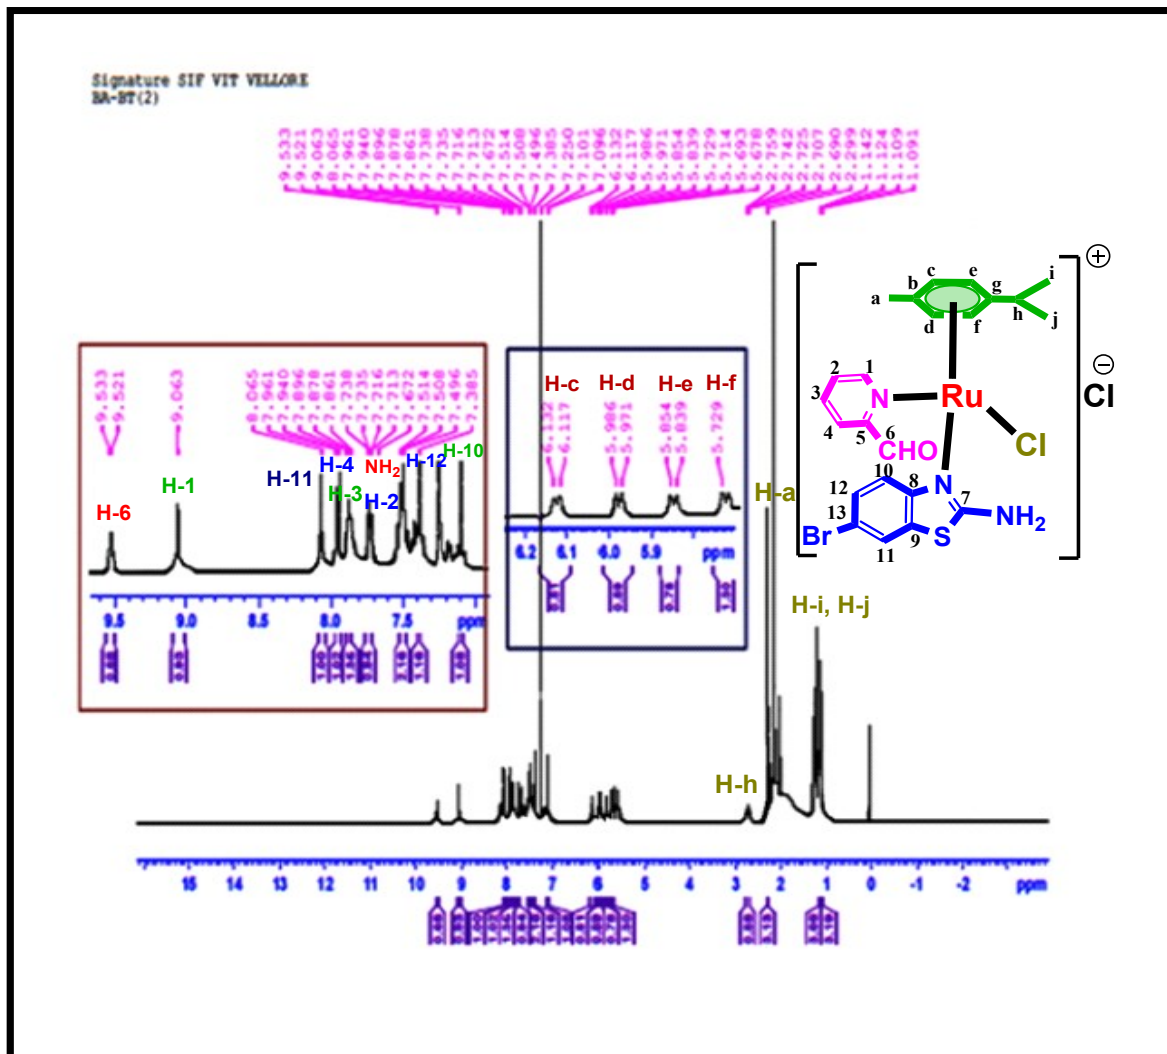

# ESI-MS of complex RuL2

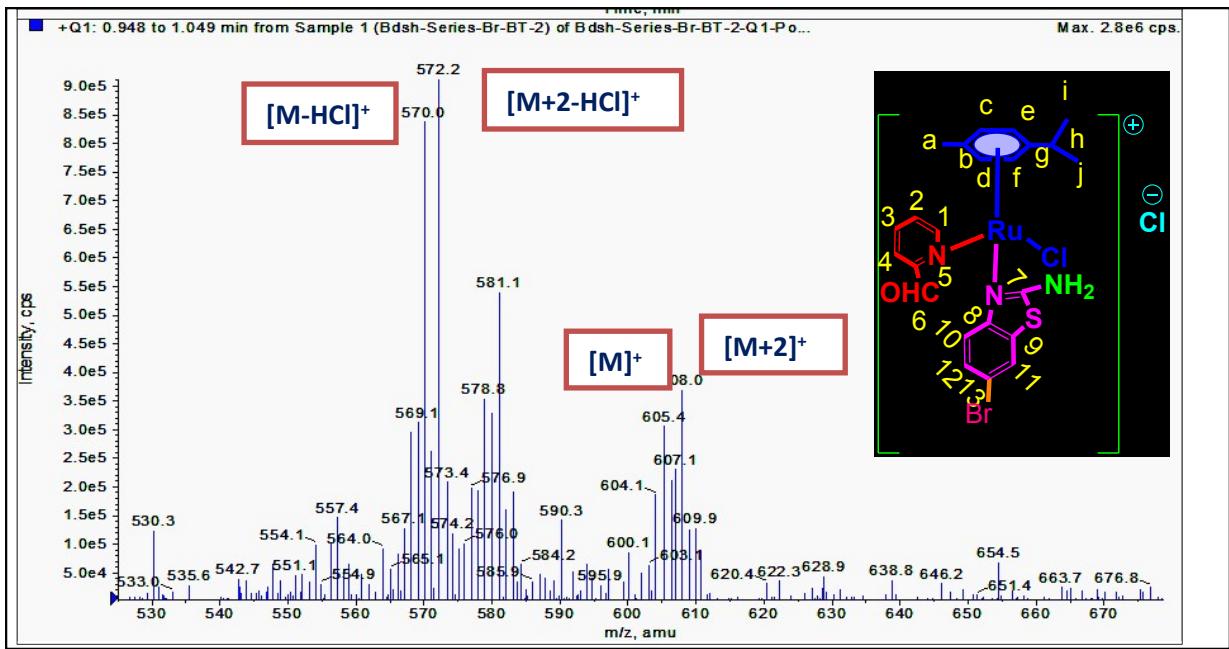

## IR spectra of RuL2

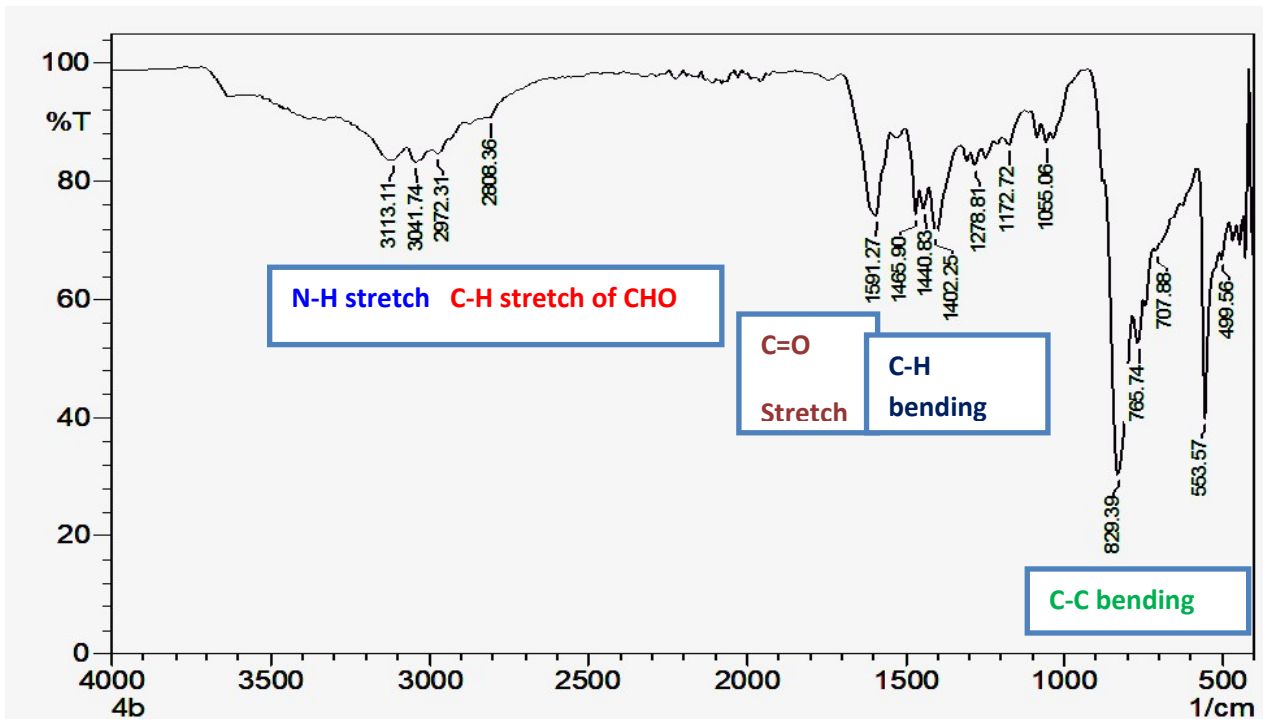

# <sup>1</sup>H NMR of RuL3

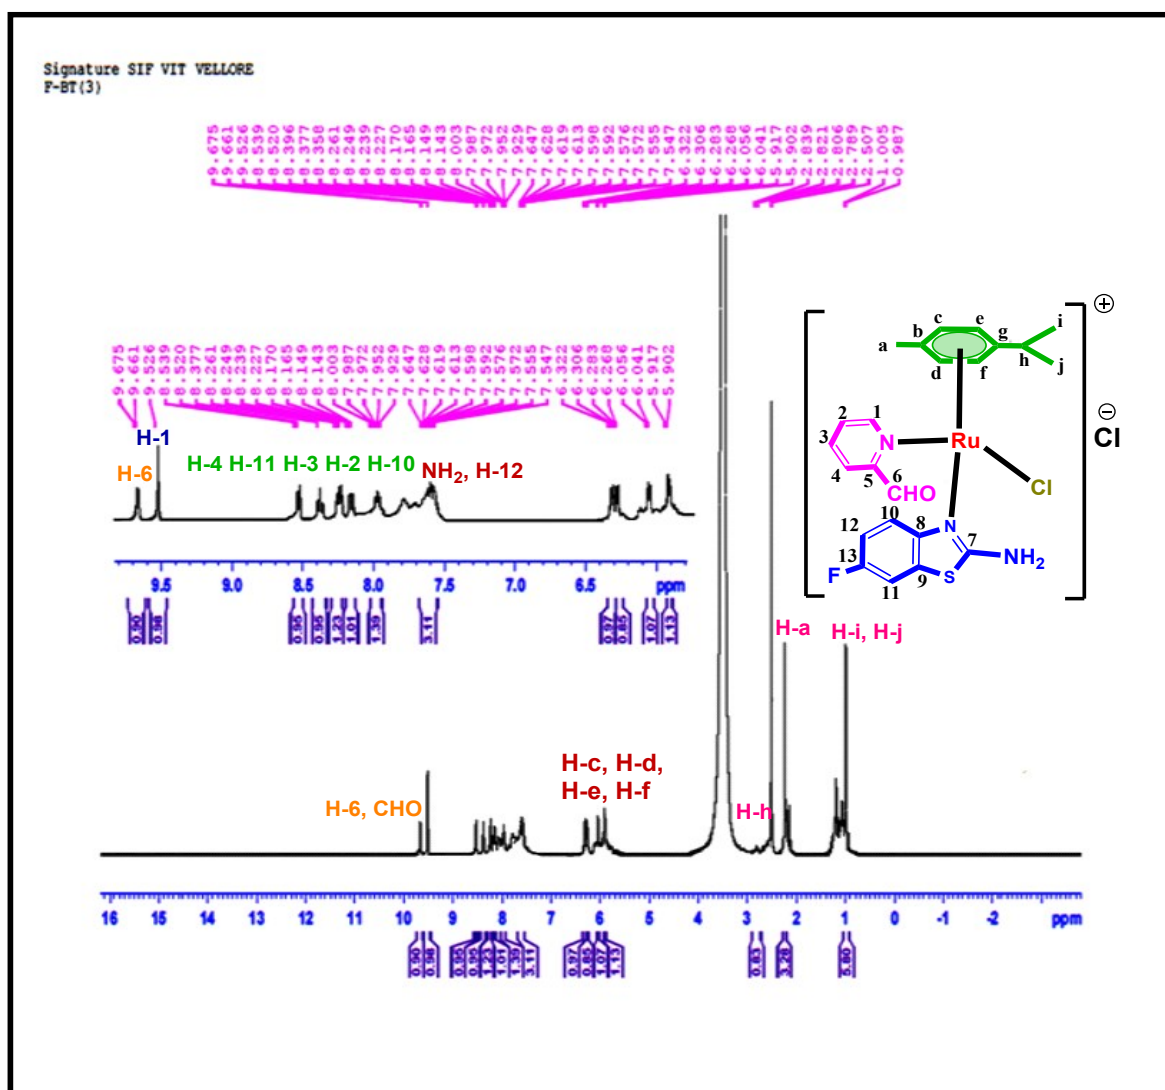

# ESI-MS of complex RuL3

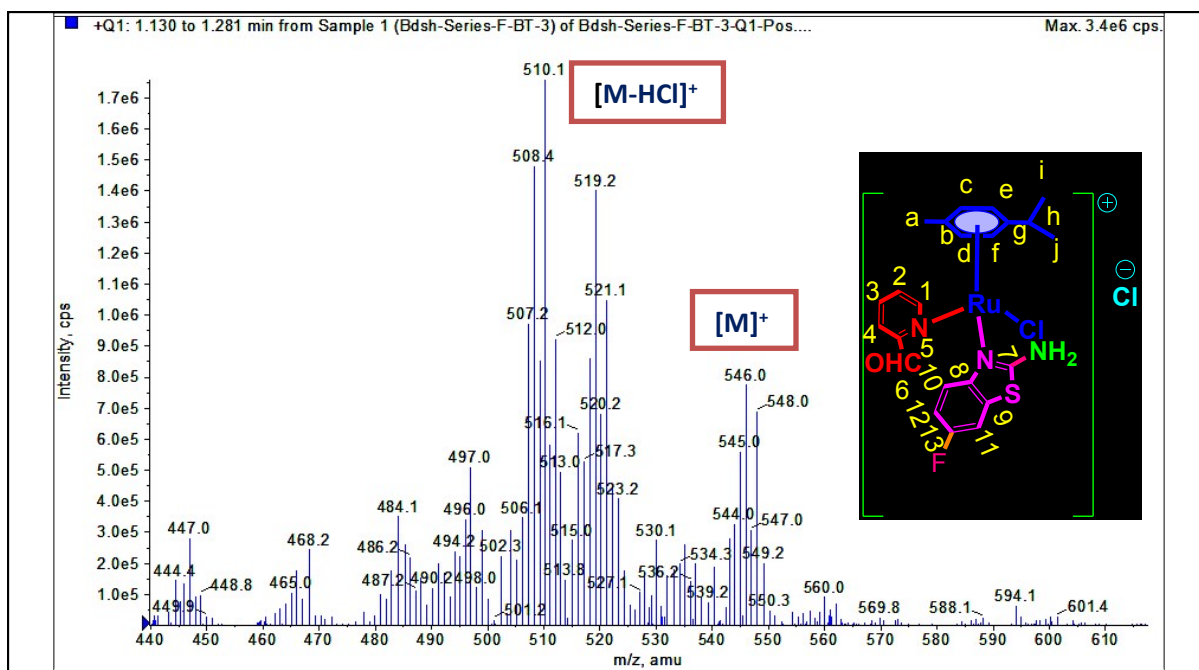

### IR spectra of complex RuL3

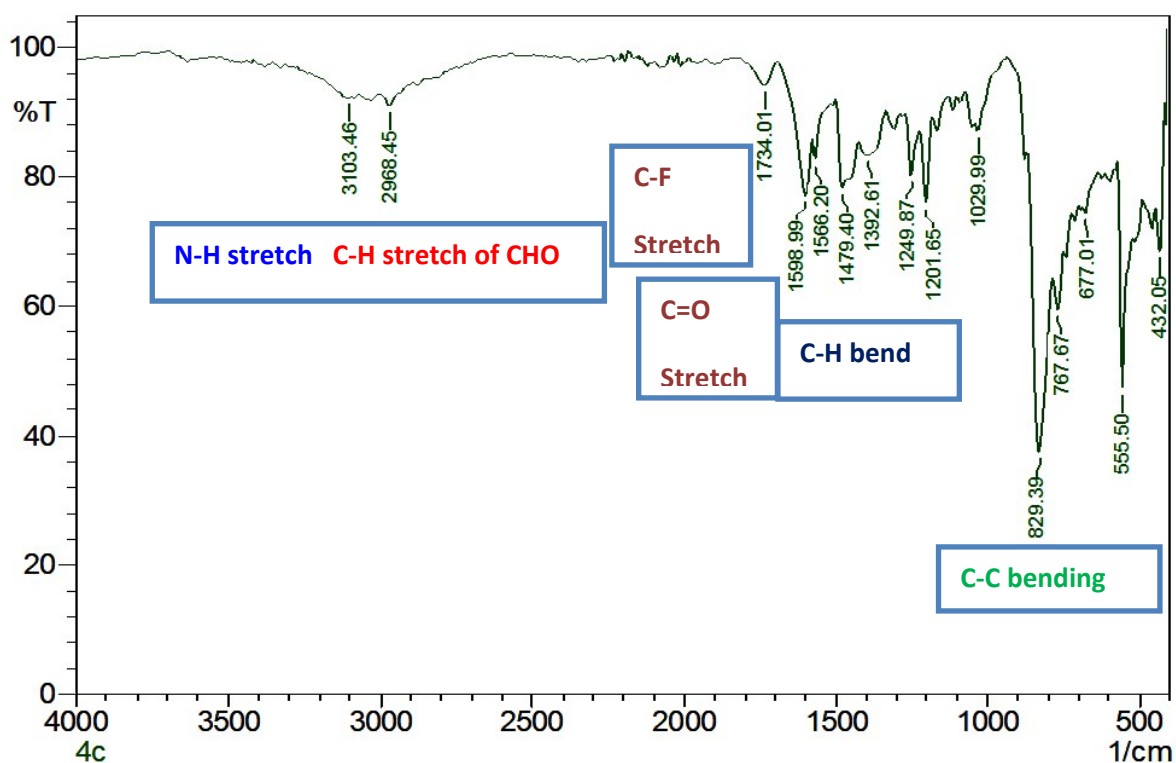

# <sup>1</sup>H NMR of RuL4

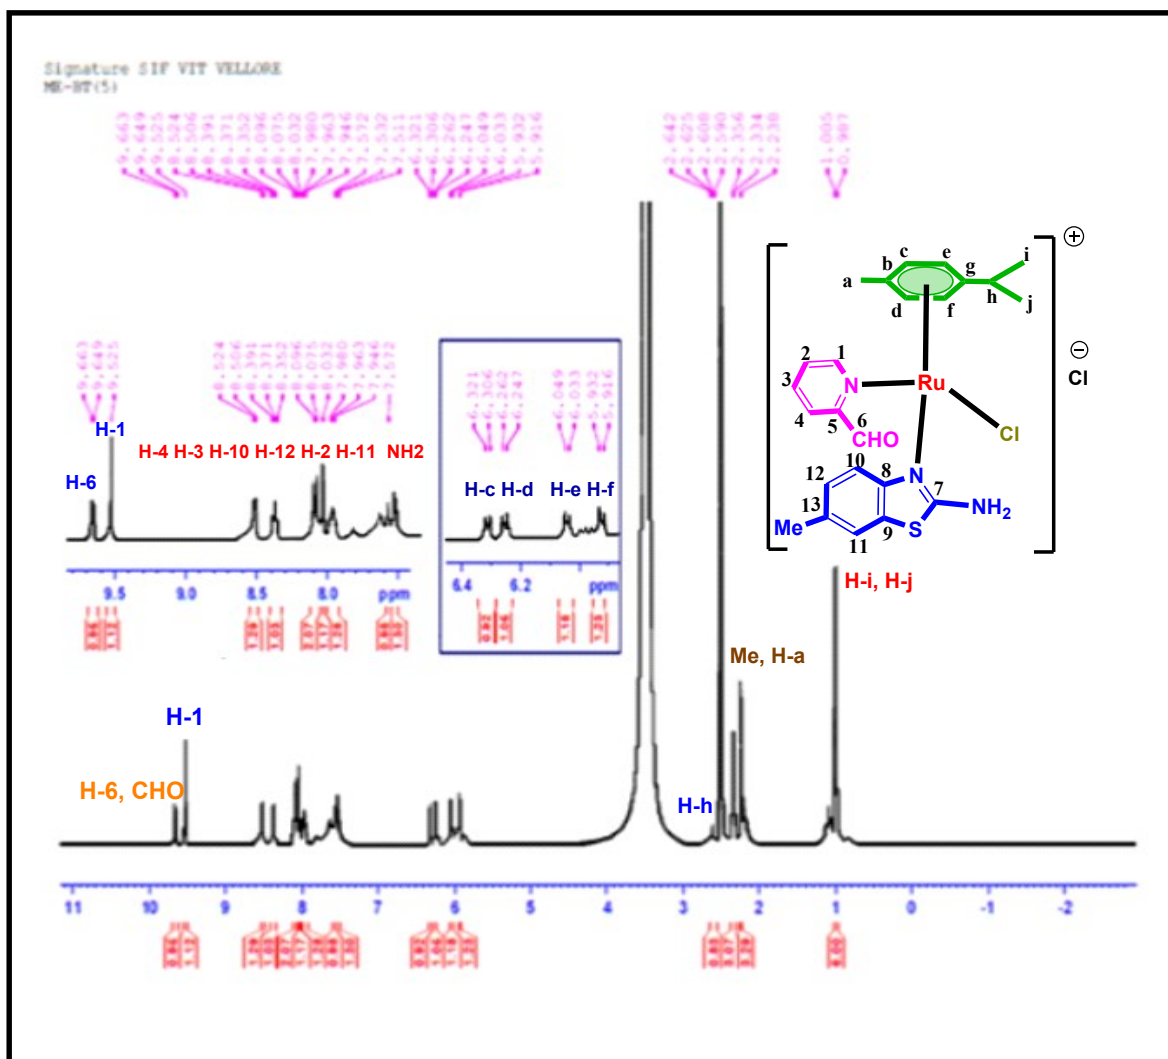

# ESI-MS of complex RuL4



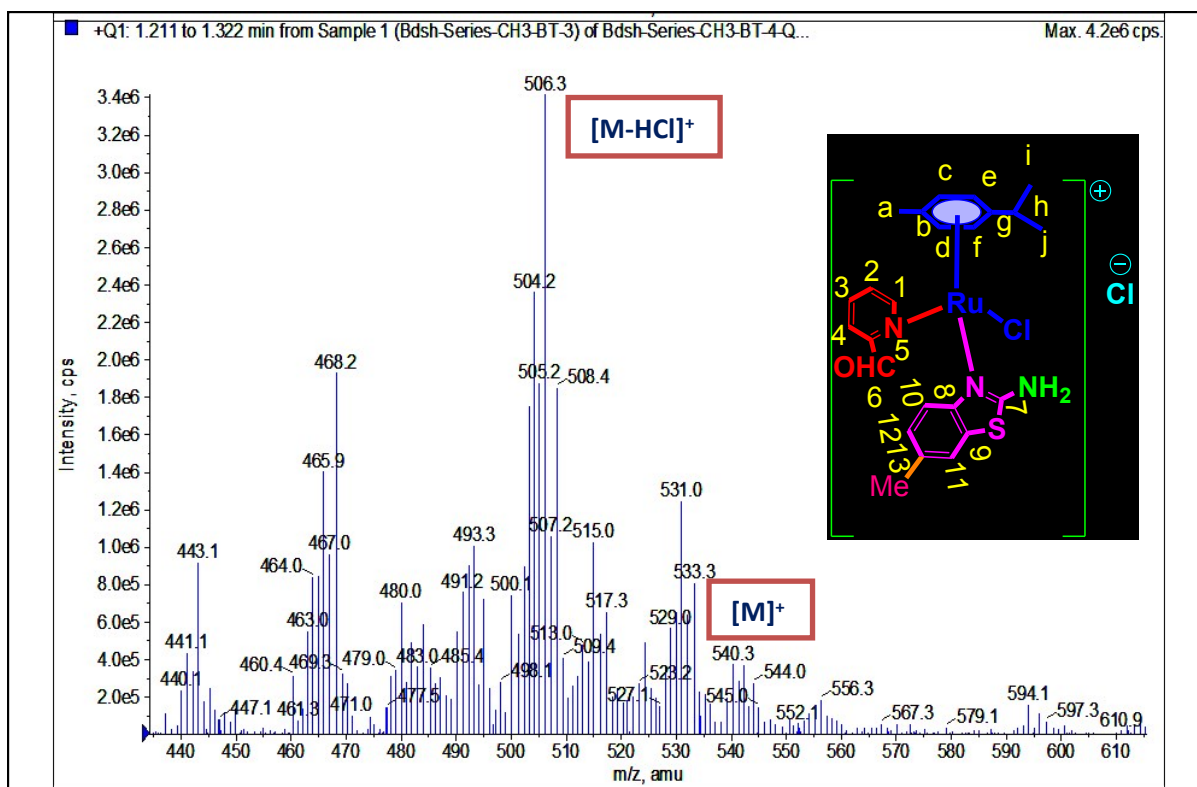

## IR spectra of complex RuL4

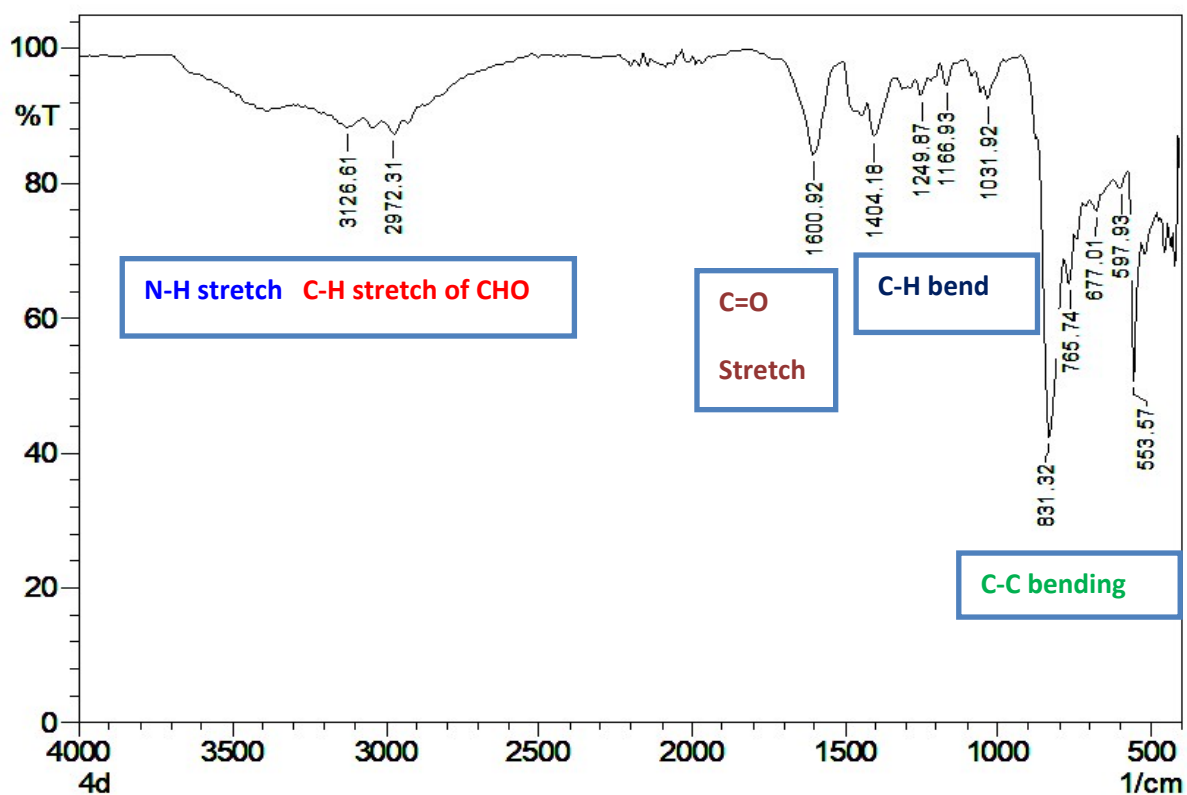

# <sup>1</sup>H NMR of RuL5

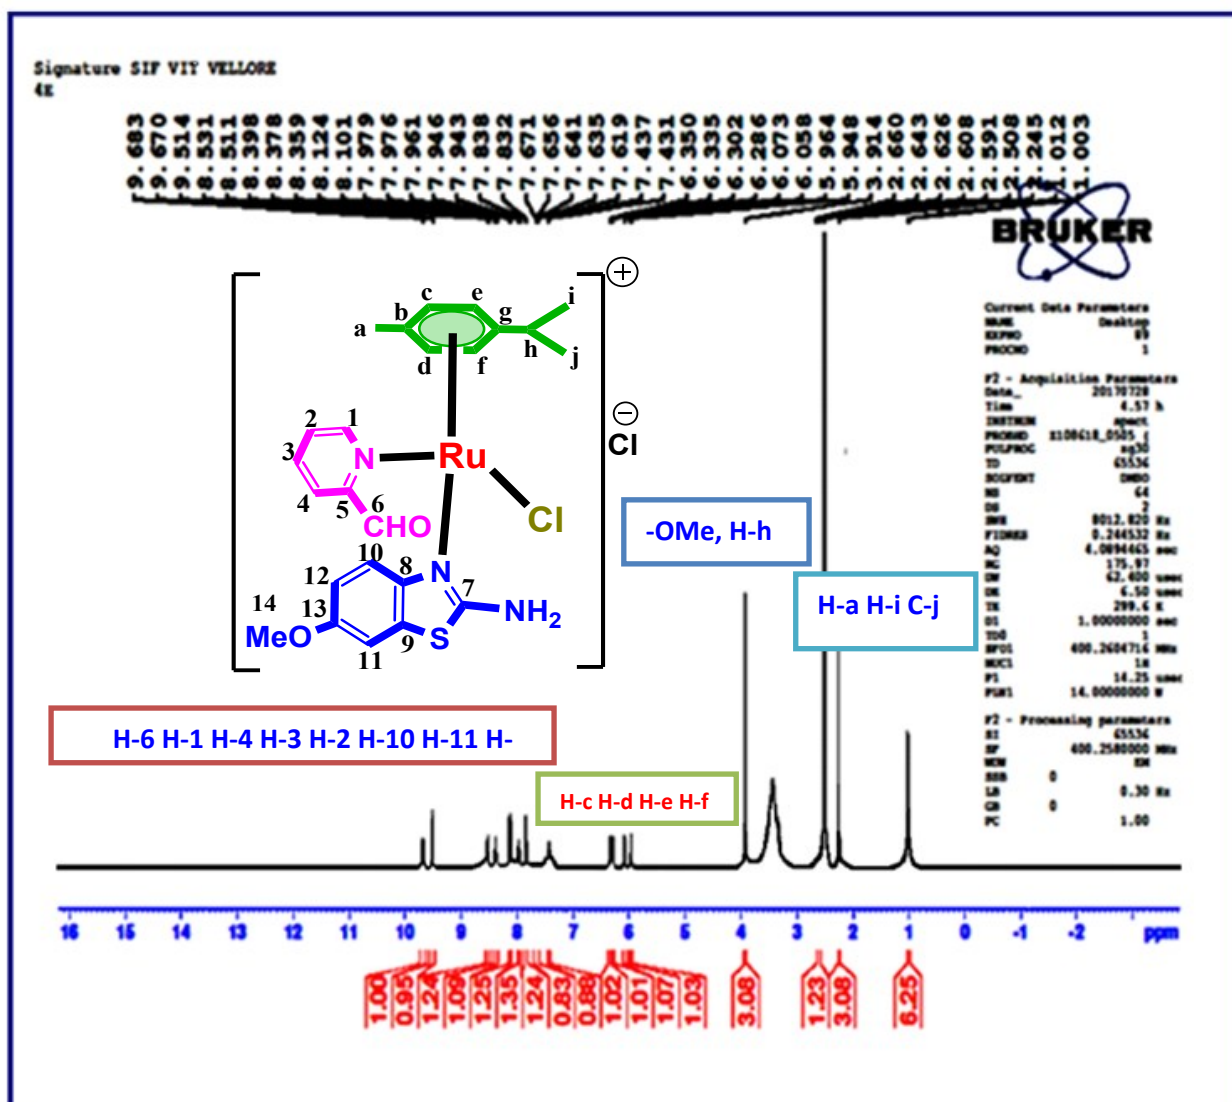

## ESI-MS of complex RuL5

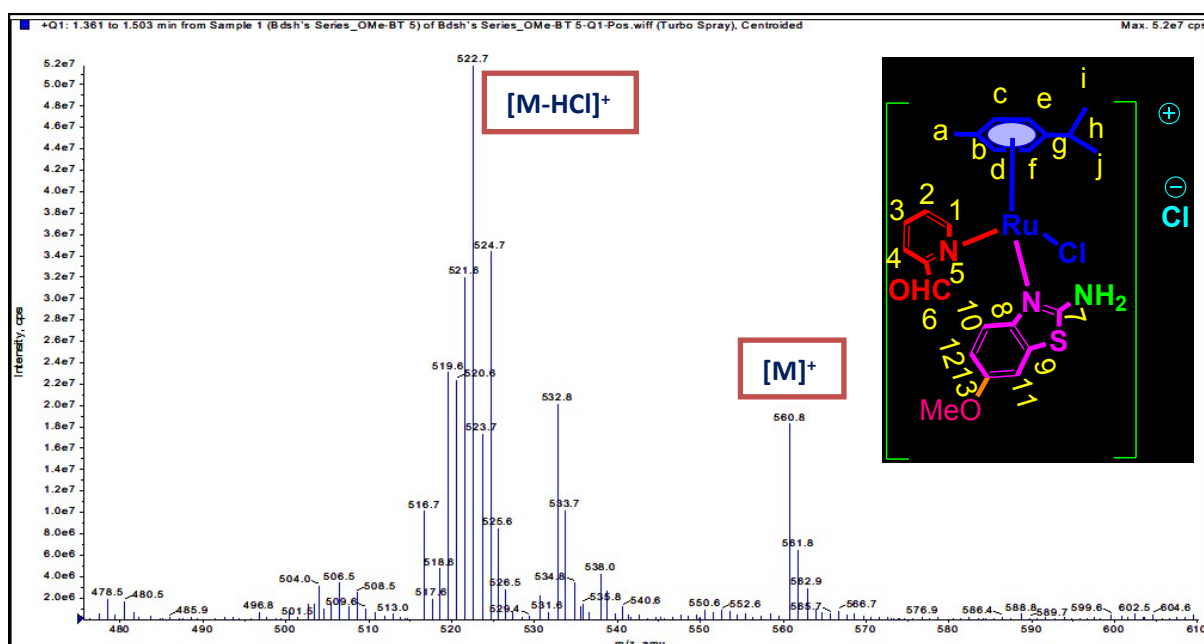

## IR spectra of RuL5

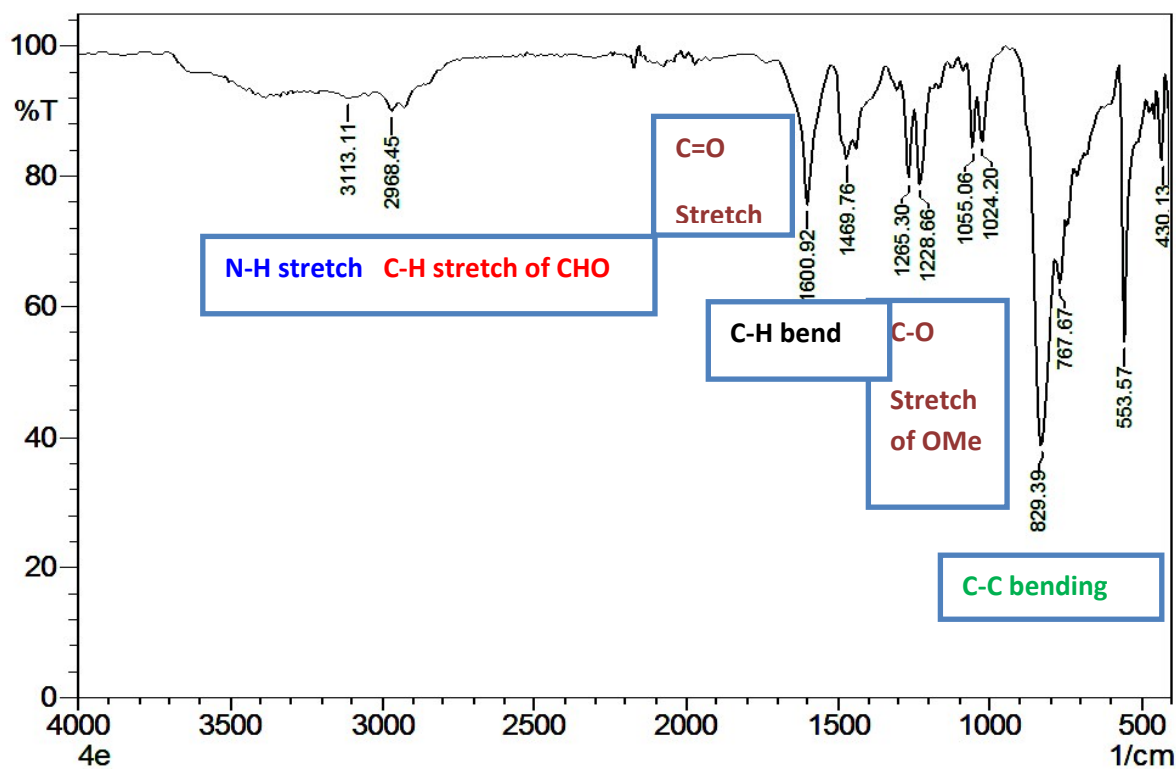

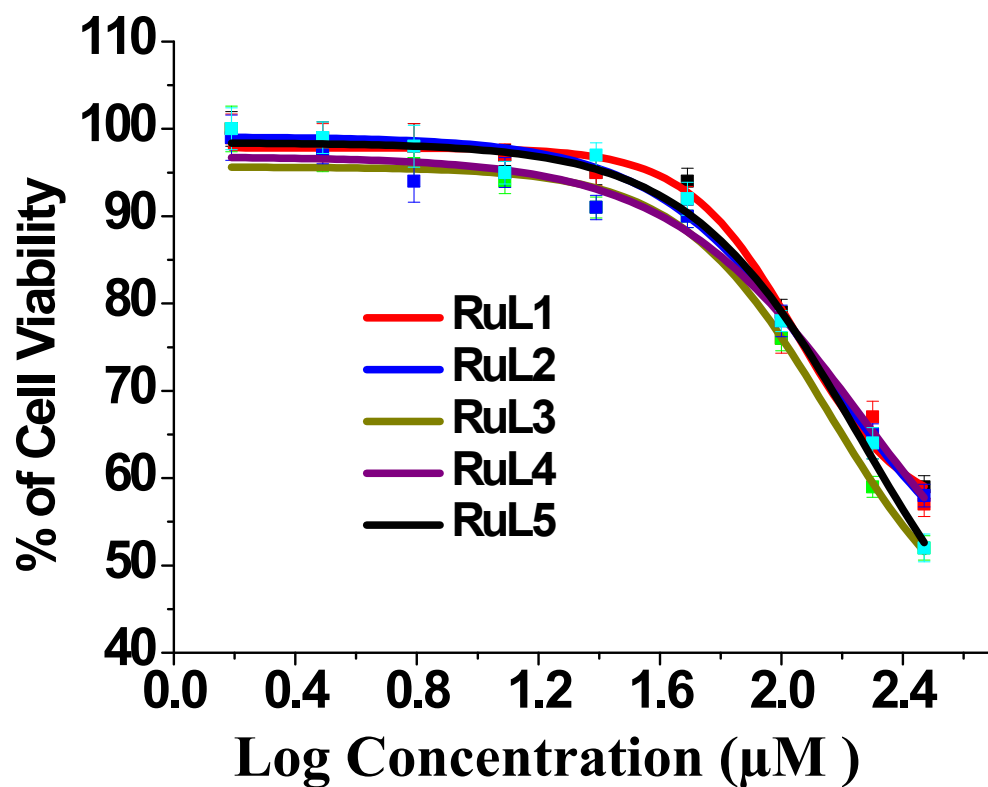

**Fig. S1** *In vitro* dose–response curves for complexes (RuL1-RuL5) against HEK-293 cells treated under 48 h CO<sub>2</sub> incubation.

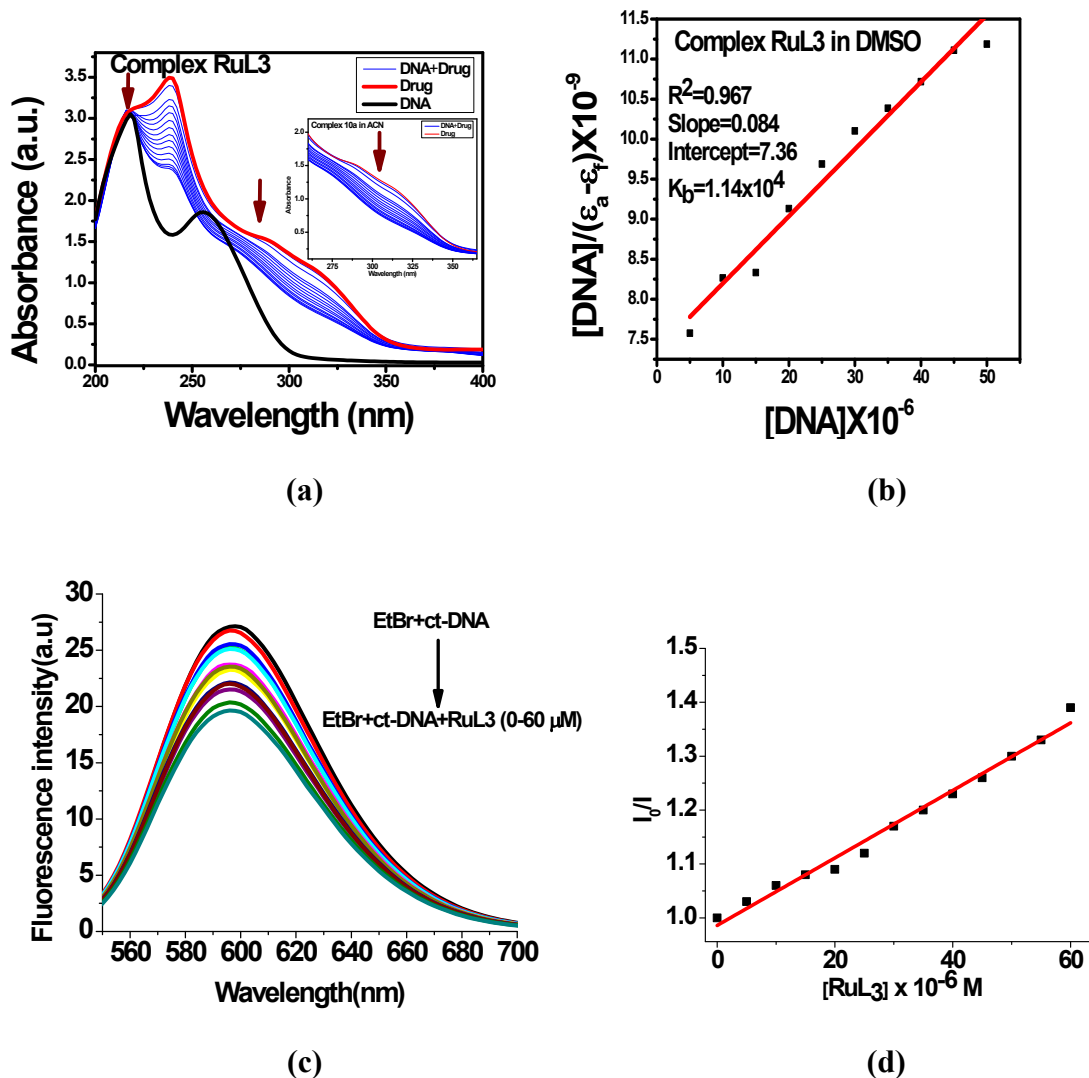

**Fig. S2.** (a) UV-Vis absorption spectrum of complex **RuL3** in absence and in presence of 10-100  $\mu\text{M}$  of ct-DNA in TrisHCl buffer (pH 7.8, T = 25  $^{\circ}\text{C}$ ). (b) plot of  $[\text{DNA}]/(\epsilon_a - \epsilon_f)$  vs  $[\text{DNA}]$ . (c) Ethidium bromide fluorescence quenching study with complex **RuL3**. (d) Stern Volmer plot of  $I_0/I$  vs.  $[\text{RuL3}]$

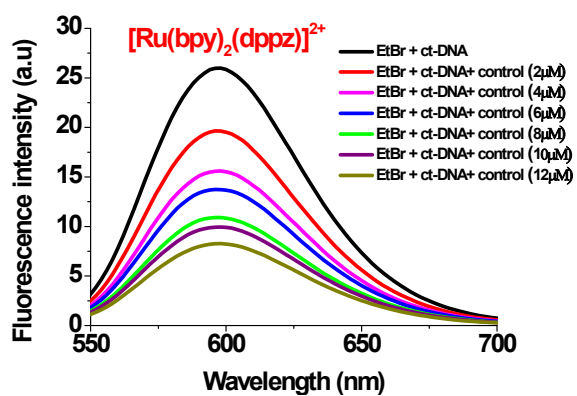

(a)

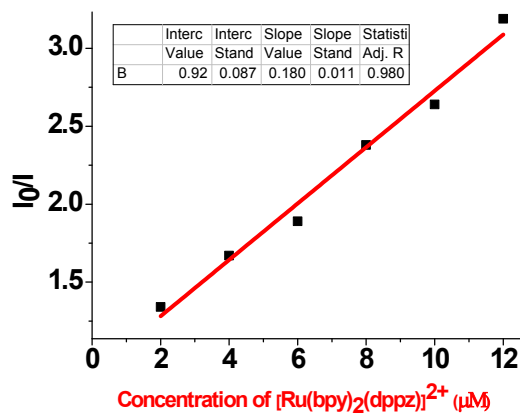

(b)

Fig. S3. (a) Ethidium bromide fluorescence quenching study with control DNA intercalator  $[\text{Ru}(\text{bpy})_2(\text{dppz})]^{2+}$  (b) Stern Volmer plot of  $I_0/I$  vs. [control]

**Table S1** Comparison of the IC<sub>50</sub> values of previously reported Ru-*p*-cymene complexes against cancer cell lines

| Complex                                                                             | IC <sub>50</sub> (μM) |            |            |
|-------------------------------------------------------------------------------------|-----------------------|------------|------------|
|                                                                                     | Cell lines            |            |            |
|                                                                                     | HeLa                  | MCF-7      | references |
| 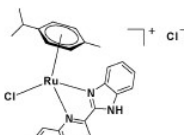   | -                     | 2.64       | 1          |
|    | -                     | 18.21      | 1          |
|    | -                     | 7.36       | 1          |
|   | -                     | 7.76-25.42 | 2          |
|  | -                     | 10.2±1.2   | 3          |
|  | -                     | 26-300     | 4          |
|  | -                     | 68±3       | 4          |
| [( <i>p</i> -cym)RuCl(HL1)]BF <sub>4</sub>                                          | -                     | 68±3       | 4          |
|  | 3.52±1.7              | -          | 5          |

## References:

1. T. A. Khan, K. Bhar, R. Thirumoorthi, T. Roy, A. K. Sharma, *New J. Chem.*, 2020, 44, 239—257.
2. (a) G. R. Jadhav, S. Sinha, M. Chhabra and P. Paira, *Bioorg. Med. Chem. Lett.*, 2016, 26, 2695–2700. (b) U. Ndagi, N. Mhlongo and M. E. Soliman, *Drug Des., Dev. Ther.*, 2017, 11, 599.
3. F. Hackenberg, H. Müller-Bunz, R. Smith, W. Streciwilk, X. Zhu and M. Tacke, *Organometallics*, 2013, 32, 5551–5560.
4. M. Martí'nez-Alonso, N. Busto, F. A. Jalo'n, B. R. Manzano, J. M. Leal, A. M. Rodr'iguez, B. Garc'a and G. Espino, *Inorg. Chem.*, 2014, 53, 11274–11288.
5. A Mondal, U Sen, N Roy, V Muthukumar, SK Sahoo, B Bose, P Paira\*, *Dalton Transactions* 2021, 50 (3), 979-997
